# Supplementary material for: Estimating road traffic impacts of commute mode shifts
Source: PubMed Central journal article supplement (PMC9833534; doi:10.1371/journal.pone.0279738), 2023-01-11
Supplement: pone.0279738.s001.pdf [file pone.0279738.s001.pdf]

**Table S1.** Common shorthand Metropolitan Statistical Area (MSA) name and the corresponding complete US Census Bureau (USCB) Official Metropolitan Statistical Area name.

| MSA shorthand        | Complete USCB MSA name                              |
|----------------------|-----------------------------------------------------|
| Akron, OH            | Akron, OH Metro Area                                |
| Albany, NY           | Albany-Schenectady-Troy, NY Metro Area              |
| Albuquerque, NM      | Albuquerque, NM Metro Area                          |
| Allentown, PA        | Allentown-Bethlehem-Easton, PA-NJ Metro Area        |
| Anchorage, AK        | Anchorage, AK Metro Area                            |
| Ann Arbor, MI        | Ann Arbor, MI Metro Area                            |
| Atlanta, GA          | Atlanta-Sandy Springs-Roswell, GA Metro Area        |
| Atlantic City, NJ    | Atlantic City-Hammonton, NJ Metro Area              |
| Austin, TX           | Austin-Round Rock, TX Metro Area                    |
| Bakersfield, CA      | Bakersfield, CA Metro Area                          |
| Baltimore, MD        | Baltimore-Columbia-Towson, MD Metro Area            |
| Baton Rouge, LA      | Baton Rouge, LA Metro Area                          |
| Birmingham, AL       | Birmingham-Hoover, AL Metro Area                    |
| Boise City, ID       | Boise City, ID Metro Area                           |
| Boston, MA           | Boston-Cambridge-Newton, MA-NH Metro Area           |
| Boulder, CO          | Boulder, CO Metro Area                              |
| Bremerton, WA        | Bremerton-Silverdale, WA Metro Area                 |
| Bridgeport, CT       | Bridgeport-Stamford-Norwalk, CT Metro Area          |
| Buffalo, NY          | Buffalo-Cheektowaga-Niagara Falls, NY Metro Area    |
| Burlington, VT       | Burlington-South Burlington, VT Metro Area          |
| Cape Coral, FL       | Cape Coral-Fort Myers, FL Metro Area                |
| Champaign, IL        | Champaign-Urbana, IL Metro Area                     |
| Charleston, SC       | Charleston-North Charleston, SC Metro Area          |
| Charlotte, NC        | Charlotte-Concord-Gastonia, NC-SC Metro Area        |
| Chattanooga, TN      | Chattanooga, TN-GA Metro Area                       |
| Chicago, IL          | Chicago-Naperville-Elgin, IL-IN-WI Metro Area       |
| Cincinnati, OH       | Cincinnati, OH-KY-IN Metro Area                     |
| Cleveland, OH        | Cleveland-Elyria, OH Metro Area                     |
| Colorado Springs, CO | Colorado Springs, CO Metro Area                     |
| Columbia, SC         | Columbia, SC Metro Area                             |
| Columbus, OH         | Columbus, OH Metro Area                             |
| Dallas, TX           | Dallas-Fort Worth-Arlington, TX Metro Area          |
| Davenport, IA        | Davenport-Moline-Rock Island, IA-IL Metro Area      |
| Dayton, OH           | Dayton, OH Metro Area                               |
| Deltona, FL          | Deltona-Daytona Beach-Ormond Beach, FL Metro Area   |
| Denver, CO           | Denver-Aurora-Lakewood, CO Metro Area               |
| Des Moines, IA       | Des Moines-West Des Moines, IA Metro Area           |
| Detroit, MI          | Detroit-Warren-Dearborn, MI Metro Area              |
| Duluth, MN           | Duluth, MN-WI Metro Area                            |
| Durham, NC           | Durham-Chapel Hill, NC Metro Area                   |
| El Paso, TX          | El Paso, TX Metro Area                              |
| Eugene, OR           | Eugene, OR Metro Area                               |
| Fort Collins, CO     | Fort Collins, CO Metro Area                         |
| Fort Wayne, IN       | Fort Wayne, IN Metro Area                           |
| Fresno, CA           | Fresno, CA Metro Area                               |
| Grand Rapids, MI     | Grand Rapids-Wyoming, MI Metro Area                 |
| Greensboro, NC       | Greensboro-High Point, NC Metro Area                |
| Greenville, SC       | Greenville-Anderson-Mauldin, SC Metro Area          |
| Harrisburg, PA       | Harrisburg-Carlisle, PA Metro Area                  |
| Hartford, CT         | Hartford-West Hartford-East Hartford, CT Metro Area |

*Continued on the next page*

Table S1 – continued from previous page

| MSA shorthand      | USCB MSA name                                           |
|--------------------|---------------------------------------------------------|
| Honolulu, KY       | Urban Honolulu, HI Metro Area                           |
| Houston, TX        | Houston-The Woodlands-Sugar Land, TX Metro Area         |
| Indianapolis, IN   | Indianapolis-Carmel-Anderson, IN Metro Area             |
| Jacksonville, FL   | Jacksonville, FL Metro Area                             |
| Kansas City, MO    | Kansas City, MO-KS Metro Area                           |
| Knoxville, TN      | Knoxville, TN Metro Area                                |
| Lancaster, PA      | Lancaster, PA Metro Area                                |
| Lansing, MI        | Lansing-East Lansing, MI Metro Area                     |
| Las Vegas, NV      | Las Vegas-Henderson-Paradise, NV Metro Area             |
| Lexington, KY      | Lexington-Fayette, KY Metro Area                        |
| Lincoln, NE        | Lincoln, NE Metro Area                                  |
| Little Rock, AR    | Little Rock-North Little Rock-Conway, AR Metro Area     |
| Los Angeles, CA    | Los Angeles-Long Beach-Anaheim, CA Metro Area           |
| Louisville, KY     | Louisville/Jefferson County, KY-IN Metro Area           |
| Madison, WI        | Madison, WI Metro Area                                  |
| Manchester, NH     | Manchester-Nashua, NH Metro Area                        |
| McAllen, TX        | McAllen-Edinburg-Mission, TX Metro Area                 |
| Memphis, TN        | Memphis, TN-MS-AR Metro Area                            |
| Miami, FL          | Miami-Fort Lauderdale-West Palm Beach, FL Metro Area    |
| Milwaukee, WI      | Milwaukee-Waukesha-West Allis, WI Metro Area            |
| Minneapolis, MN    | Minneapolis-St. Paul-Bloomington, MN-WI Metro Area      |
| Nashville, TN      | Nashville-Davidson–Murfreesboro–Franklin, TN Metro Area |
| New Haven, CT      | New Haven-Milford, CT Metro Area                        |
| New Orleans, LA    | New Orleans-Metairie, LA Metro Area                     |
| New York, NY       | New York-Newark-Jersey City, NY-NJ-PA Metro Area        |
| North Port, FL     | North Port-Sarasota-Bradenton, FL Metro Area            |
| Ogden, UT          | Ogden-Clearfield, UT Metro Area                         |
| Oklahoma City, OK  | Oklahoma City, OK Metro Area                            |
| Omaha, NE          | Omaha-Council Bluffs, NE-IA Metro Area                  |
| Orlando, FL        | Orlando-Kissimmee-Sanford, FL Metro Area                |
| Oxnard, CA         | Oxnard-Thousand Oaks-Ventura, CA Metro Area             |
| Peoria, IL         | Peoria, IL Metro Area                                   |
| Philadelphia, PA   | Philadelphia-Camden-Wilmington, PA-NJ-DE-MD Metro Area  |
| Phoenix, AZ        | Phoenix-Mesa-Scottsdale, AZ Metro Area                  |
| Pittsburgh, PA     | Pittsburgh, PA Metro Area                               |
| Portland, ME       | Portland-South Portland, ME Metro Area                  |
| Portland, OR       | Portland-Vancouver-Hillsboro, OR-WA Metro Area          |
| Providence, RI     | Providence-Warwick, RI-MA Metro Area                    |
| Provo, UT          | Provo-Orem, UT Metro Area                               |
| Raleigh, NC        | Raleigh, NC Metro Area                                  |
| Reading, PA        | Reading, PA Metro Area                                  |
| Reno, NV           | Reno, NV Metro Area                                     |
| Richmond, VA       | Richmond, VA Metro Area                                 |
| Riverside, CA      | Riverside-San Bernardino-Ontario, CA Metro Area         |
| Rochester, MN      | Rochester, MN Metro Area                                |
| Rochester, NY      | Rochester, NY Metro Area                                |
| Sacramento, CA     | Sacramento–Roseville–Arden-Arcade, CA Metro Area        |
| Salem, OR          | Salem, OR Metro Area                                    |
| Salinas, CA        | Salinas, CA Metro Area                                  |
| Salt Lake City, UT | Salt Lake City, UT Metro Area                           |
| San Antonio, TX    | San Antonio-New Braunfels, TX Metro Area                |
| San Diego, CA      | San Diego-Carlsbad, CA Metro Area                       |

*Continued on the next page*

Table S1 – continued from previous page

| MSA shorthand      | USCB MSA name                                           |
|--------------------|---------------------------------------------------------|
| San Francisco, CA  | San Francisco-Oakland-Hayward, CA Metro Area            |
| San Jose, CA       | San Jose-Sunnyvale-Santa Clara, CA Metro Area           |
| San Juan, PR       | San Juan-Carolina-Caguas, PR Metro Area                 |
| Santa Cruz, CA     | Santa Cruz-Watsonville, CA Metro Area                   |
| Santa Maria, CA    | Santa Maria-Santa Barbara, CA Metro Area                |
| Santa Rosa, CA     | Santa Rosa, CA Metro Area                               |
| Savannah, GA       | Savannah, GA Metro Area                                 |
| Scranton, PA       | Scranton-Wilkes-Barre-Hazleton, PA Metro Area           |
| Seattle, WA        | Seattle-Tacoma-Bellevue, WA Metro Area                  |
| South Bend, IN     | South Bend-Mishawaka, IN-MI Metro Area                  |
| Spokane, WA        | Spokane-Spokane Valley, WA Metro Area                   |
| Springfield, MA    | Springfield, MA Metro Area                              |
| St. Louis, MO      | St. Louis, MO-IL Metro Area                             |
| Stockton, CA       | Stockton-Lodi, CA Metro Area                            |
| Syracuse, NY       | Syracuse, NY Metro Area                                 |
| Tampa, FL          | Tampa-St. Petersburg-Clearwater, FL Metro Area          |
| Toledo, OH         | Toledo, OH Metro Area                                   |
| Trenton, NJ        | Trenton, NJ Metro Area                                  |
| Tucson, AZ         | Tucson, AZ Metro Area                                   |
| Tulsa, OK          | Tulsa, OK Metro Area                                    |
| Vallejo, CA        | Vallejo-Fairfield, CA Metro Area                        |
| Virginia Beach, VA | Virginia Beach-Norfolk-Newport News, VA-NC Metro Area   |
| Visalia, CA        | Visalia-Porterville, CA Metro Area                      |
| Washington, DC     | Washington-Arlington-Alexandria, DC-VA-MD-WV Metro Area |
| Wichita, KS        | Wichita, KS Metro Area                                  |
| Winston, NC        | Winston-Salem, NC Metro Area                            |
| Worcester, MA      | Worcester, MA-CT Metro Area                             |
| York, PA           | York-Hanover, PA Metro Area                             |
| Youngstown, OH     | Youngstown-Warren-Boardman, OH-PA Metro Area            |
