# Supplementary material for: Estimating road traffic impacts of commute mode shifts
Source: PubMed Central journal article supplement (PMC9833534; doi:10.1371/journal.pone.0279738), 2023-01-11
Supplement: pone.0279738.s002.pdf [file pone.0279738.s002.pdf]

**Table S2.** Summary of BPR models for all 74 analysed metro areas. Years of data available for fitting the model and performance measures for the fitted model.

|               | years of data | LOO RMSE<br>(min) | $R^2$ |
|---------------|---------------|-------------------|-------|
| New York      | 6             | 0.48              | 0.73  |
| San Francisco | 9             | 0.73              | 0.92  |
| Los Angeles   | 6             | 0.38              | 0.95  |
| Boston        | 9             | 0.42              | 0.88  |
| Chicago       | 9             | 0.30              | 0.78  |
| Philadelphia  | 9             | 0.25              | 0.93  |
| Seattle       | 9             | 0.32              | 0.97  |
| Houston       | 9             | 0.52              | 0.86  |
| Dallas        | 9             | 0.36              | 0.91  |
| San Jose      | 9             | 0.93              | 0.87  |
| Atlanta       | 9             | 0.38              | 0.92  |
| Miami         | 9             | 0.37              | 0.94  |
| Portland      | 9             | 0.36              | 0.95  |
| Riverside     | 8             | 0.40              | 0.93  |
| Orlando       | 9             | 0.60              | 0.85  |
| Washington    | 9             | 0.48              | 0.42  |
| Baltimore     | 9             | 0.40              | 0.80  |
| Tampa         | 9             | 0.25              | 0.94  |
| Denver        | 9             | 0.17              | 0.97  |
| Providence    | 9             | 0.48              | 0.73  |
| Jacksonville  | 9             | 0.66              | 0.73  |
| San Diego     | 9             | 0.34              | 0.93  |
| Phoenix       | 9             | 0.27              | 0.77  |
| San Antonio   | 9             | 0.46              | 0.74  |
| Cincinnati    | 9             | 0.27              | 0.71  |
| Oxnard        | 9             | 0.59              | 0.88  |
| Raleigh       | 9             | 0.33              | 0.94  |
| Austin        | 6             | 0.14              | 0.98  |
| St. Louis     | 9             | 0.33              | 0.79  |
| Charlotte     | 6             | 0.15              | 0.97  |
| Pittsburgh    | 9             | 0.34              | 0.52  |
| North Port    | 8             | 0.87              | 0.72  |
| Allentown     | 9             | 0.58              | 0.63  |
| Oklahoma City | 9             | 0.22              | 0.88  |
| Nashville     | 9             | 0.24              | 0.96  |
| Minneapolis   | 9             | 0.14              | 0.79  |
| Charleston    | 6             | 0.71              | 0.88  |
| Sacramento    | 9             | 0.29              | 0.91  |
| Santa Rosa    | 9             | 0.77              | 0.55  |
| Boise City    | 9             | 0.54              | 0.61  |
| Kansas City   | 9             | 0.21              | 0.81  |
| Louisville    | 9             | 0.29              | 0.50  |
| Savannah      | 6             | 0.69              | 0.74  |
| Reading       | 9             | 0.57              | 0.44  |
| Bremerton     | 8             | 0.96              | 0.51  |
| Richmond      | 9             | 0.34              | 0.67  |
| Bridgeport    | 9             | 0.66              | 0.43  |
| Buffalo       | 9             | 0.44              | 0.47  |
| Boulder       | 9             | 0.84              | 0.54  |

*Continued on the next page*

Table S2 – continued from previous page

|                  | years of data | LOO RMSE<br>(min) | $R^2$ |
|------------------|---------------|-------------------|-------|
| Lexington        | 7             | 0.68              | 0.48  |
| Ann Arbor        | 9             | 0.37              | 0.73  |
| Tucson           | 9             | 0.57              | 0.55  |
| Durham           | 9             | 0.31              | 0.91  |
| Omaha            | 9             | 0.24              | 0.62  |
| Hartford         | 9             | 0.45              | 0.45  |
| Lancaster        | 9             | 0.67              | 0.74  |
| Colorado Springs | 9             | 0.53              | 0.36  |
| Lincoln          | 9             | 0.71              | 0.51  |
| Salinas          | 9             | 0.55              | 0.42  |
| Rochester        | 9             | 0.68              | 0.42  |
| Duluth           | 9             | 0.66              | 0.34  |
| Provo            | 9             | 0.65              | 0.49  |
| Salt Lake City   | 9             | 0.37              | 0.64  |
| Greenville       | 6             | 0.42              | 0.80  |
| Memphis          | 9             | 0.21              | 0.61  |
| Stockton         | 9             | 1.00              | 0.86  |
| Vallejo          | 9             | 0.99              | 0.58  |
| Las Vegas        | 9             | 0.40              | 0.69  |
| Ogden            | 9             | 0.31              | 0.62  |
| Virginia Beach   | 9             | 0.47              | 0.48  |
| Fresno           | 9             | 0.71              | 0.35  |
| Baton Rouge      | 9             | 0.86              | 0.49  |
| Detroit          | 9             | 0.30              | 0.78  |
| Tulsa            | 9             | 0.53              | 0.36  |
