# Supplementary material for: Estimating road traffic impacts of commute mode shifts
Source: PubMed Central journal article supplement (PMC9833534; doi:10.1371/journal.pone.0279738), 2023-01-11
Supplement: pone.0279738.s003.pdf [file pone.0279738.s003.pdf]

**Table S3.** Summary of city transportation status in 2018 and prediction if one in four commuters switch from transit or car share mode to SOV mode. All 74 analysed cities are shown, ranked by total cost per day. The range shows one standard deviation of the predictions. M denotes millions. B denotes billions. The major city is listed here in representation of the metro area.

|               | transportation status in 2018 |                        |                              |                          |                        | prediction for 25% switch |                     |                                  |  |
|---------------|-------------------------------|------------------------|------------------------------|--------------------------|------------------------|---------------------------|---------------------|----------------------------------|--|
|               | total commuters (M)           | passenger vehicles (M) | transit (M) (% of commuters) | rid- & travel time (min) | passenger vehicles (M) | added time (min)          | added \$ per person | total added \$ cost per year (B) |  |
| New York      | 8.72                          | 5.16                   | 3.0(34.43%)                  | 31.00                    | 6.05                   | 6.7±0.6                   | 1065.0±95.0         | 25.78±8.65                       |  |
| San Francisco | 2.14                          | 1.49                   | 0.42(19.56%)                 | 34.30                    | 1.65                   | 10.0±0.8                  | 1601.0±128.0        | 10.58±1.85                       |  |
| Los Angeles   | 5.92                          | 5.13                   | 0.31(5.24%)                  | 31.60                    | 5.32                   | 1.4±0.4                   | 220.0±63.0          | 4.69±1.62                        |  |
| Boston        | 2.30                          | 1.79                   | 0.34(14.90%)                 | 31.70                    | 1.92                   | 3.0±0.6                   | 470.0±102.0         | 3.61±0.98                        |  |
| Chicago       | 4.32                          | 3.46                   | 0.57(13.19%)                 | 30.10                    | 3.68                   | 1.4±0.2                   | 216.0±30.0          | 3.17±1.29                        |  |
| Philadelphia  | 2.71                          | 2.25                   | 0.29(10.78%)                 | 28.80                    | 2.36                   | 1.8±1.1                   | 291.0±178.0         | 2.75±0.65                        |  |
| Seattle       | 1.84                          | 1.46                   | 0.22(11.95%)                 | 30.60                    | 1.55                   | 2.6±0.6                   | 422.0±100.0         | 2.62±0.48                        |  |
| Houston       | 3.10                          | 2.81                   | 0.06(2.09%)                  | 30.40                    | 2.88                   | 0.5±0.3                   | 87.0±44.0           | 1.0±1.15                         |  |
| Dallas        | 3.49                          | 3.20                   | 0.05(1.42%)                  | 28.80                    | 3.27                   | 0.4±0.5                   | 60.0±77.0           | 0.78±0.83                        |  |
| San Jose      | 0.95                          | 0.82                   | 0.04(4.26%)                  | 33.00                    | 0.85                   | 2.2±0.5                   | 344.0±84.0          | 1.17±0.79                        |  |
| Atlanta       | 2.68                          | 2.39                   | 0.09(3.27%)                  | 32.40                    | 2.46                   | 0.7±1.1                   | 107.0±173.0         | 1.05±0.8                         |  |
| Miami         | 2.77                          | 2.44                   | 0.09(3.38%)                  | 29.90                    | 2.53                   | 0.9±0.5                   | 149.0±81.0          | 1.5±0.85                         |  |
| Portland      | 1.12                          | 0.95                   | 0.08(6.92%)                  | 27.00                    | 0.99                   | 1.2±0.4                   | 195.0±58.0          | 0.77±0.28                        |  |
| Riverside     | 1.86                          | 1.69                   | 0.02(1.33%)                  | 27.80                    | 1.73                   | 0.5±0.2                   | 80.0±31.0           | 0.55±0.5                         |  |
| Orlando       | 1.17                          | 1.06                   | 0.02(1.43%)                  | 29.90                    | 1.09                   | 0.5±0.7                   | 84.0±111.0          | 0.37±0.48                        |  |
| Washington    | 3.03                          | 2.34                   | 0.44(14.36%)                 | 34.30                    | 2.52                   | 0.6±0.4                   | 101.0±59.0          | 1.02±1.18                        |  |
| Baltimore     | 1.30                          | 1.14                   | 0.08(6.49%)                  | 29.90                    | 1.18                   | 1.1±0.8                   | 171.0±129.0         | 0.81±0.45                        |  |
| Tampa         | 1.31                          | 1.20                   | 0.02(1.45%)                  | 27.60                    | 1.23                   | 0.5±1.1                   | 73.0±180.0          | 0.36±0.25                        |  |
| Denver        | 1.43                          | 1.27                   | 0.06(4.26%)                  | 27.60                    | 1.31                   | 0.5±0.3                   | 79.0±42.0           | 0.41±0.18                        |  |
| Providence    | 0.75                          | 0.68                   | 0.02(2.52%)                  | 23.70                    | 0.70                   | 0.6±0.9                   | 90.0±149.0          | 0.25±0.29                        |  |
| Jacksonville  | 0.67                          | 0.61                   | 0.01(1.03%)                  | 27.30                    | 0.63                   | 0.4±0.3                   | 69.0±48.0           | 0.17±0.32                        |  |
| San Diego     | 1.49                          | 1.33                   | 0.04(2.93%)                  | 26.90                    | 1.37                   | 0.8±0.8                   | 122.0±127.0         | 0.67±0.4                         |  |
| Phoenix       | 2.07                          | 1.84                   | 0.04(1.96%)                  | 26.10                    | 1.90                   | 0.3±0.6                   | 41.0±101.0          | 0.31±0.44                        |  |
| San Antonio   | 1.08                          | 0.97                   | 0.02(1.90%)                  | 25.90                    | 1.00                   | 0.4±1.1                   | 66.0±169.0          | 0.26±0.4                         |  |
| Cincinnati    | 1.00                          | 0.92                   | 0.02(1.83%)                  | 25.20                    | 0.94                   | 0.3±0.8                   | 47.0±122.0          | 0.18±0.22                        |  |
| Oxnard        | 0.38                          | 0.35                   | 0.0(1.15%)                   | 24.80                    | 0.36                   | 1.0±0.7                   | 151.0±110.0         | 0.22±0.18                        |  |
| Raleigh       | 0.63                          | 0.59                   | 0.01(1.02%)                  | 26.80                    | 0.60                   | 0.4±0.6                   | 60.0±99.0           | 0.14±0.14                        |  |
| Austin        | 1.03                          | 0.93                   | 0.02(2.08%)                  | 28.00                    | 0.96                   | 0.4±0.7                   | 69.0±111.0          | 0.26±0.12                        |  |
| St. Louis     | 1.30                          | 1.21                   | 0.03(2.19%)                  | 25.90                    | 1.23                   | 0.5±0.4                   | 76.0±55.0           | 0.38±0.33                        |  |
| Charlotte     | 1.17                          | 1.07                   | 0.02(1.67%)                  | 27.40                    | 1.10                   | 0.3±0.4                   | 52.0±71.0           | 0.23±0.12                        |  |
| Pittsburgh    | 1.05                          | 0.92                   | 0.06(6.10%)                  | 26.60                    | 0.95                   | 0.6±0.2                   | 89.0±39.0           | 0.34±0.32                        |  |
| North Port    | 0.31                          | 0.29                   | 0.0(0.59%)                   | 25.60                    | 0.29                   | 0.5±0.4                   | 78.0±71.0           | 0.09±0.21                        |  |
| Allentown     | 0.38                          | 0.35                   | 0.01(1.87%)                  | 24.40                    | 0.35                   | 0.5±0.4                   | 73.0±60.0           | 0.1±0.14                         |  |
| Oklahoma City | 0.64                          | 0.59                   | 0.0(0.67%)                   | 23.40                    | 0.60                   | 0.2±0.5                   | 39.0±75.0           | 0.09±0.1                         |  |
| Nashville     | 0.92                          | 0.85                   | 0.01(0.88%)                  | 29.10                    | 0.87                   | 0.3±0.2                   | 54.0±35.0           | 0.19±0.17                        |  |
| Minneapolis   | 1.79                          | 1.58                   | 0.09(4.90%)                  | 25.40                    | 1.64                   | 0.2±0.5                   | 32.0±80.0           | 0.21±0.21                        |  |
| Charleston    | 0.36                          | 0.33                   | 0.0(0.88%)                   | 28.40                    | 0.34                   | 0.7±0.4                   | 106.0±58.0          | 0.14±0.18                        |  |
| Sacramento    | 0.97                          | 0.87                   | 0.02(2.48%)                  | 26.60                    | 0.89                   | 0.5±0.7                   | 73.0±113.0          | 0.26±0.2                         |  |
| Santa Rosa    | 0.23                          | 0.21                   | 0.01(2.30%)                  | 23.60                    | 0.21                   | 0.5±0.8                   | 83.0±127.0          | 0.07±0.15                        |  |
| Boise City    | 0.32                          | 0.29                   | 0.0(0.30%)                   | 22.10                    | 0.30                   | 0.2±0.7                   | 27.0±107.0          | 0.03±0.12                        |  |
| Kansas City   | 1.01                          | 0.94                   | 0.01(0.97%)                  | 23.60                    | 0.96                   | 0.2±0.4                   | 30.0±72.0           | 0.12±0.15                        |  |
| Louisville    | 0.59                          | 0.54                   | 0.01(1.83%)                  | 24.80                    | 0.55                   | 0.3±0.7                   | 46.0±117.0          | 0.1±0.16                         |  |
| Savannah      | 0.18                          | 0.16                   | 0.0(1.25%)                   | 26.70                    | 0.17                   | 0.4±0.8                   | 65.0±134.0          | 0.04±0.08                        |  |

Continued on the next page

Table S3 – continued from previous page

|                  | transportation status in 2018 |                        |              |        | prediction for 25% switch |                        |                  |                          |                                  |
|------------------|-------------------------------|------------------------|--------------|--------|---------------------------|------------------------|------------------|--------------------------|----------------------------------|
|                  | total commuters (M)           | passenger vehicles (M) | transit (M)  | riders | travel time (min)         | passenger vehicles (M) | added time (min) | added \$ cost per person | total added \$ cost per year (B) |
| Reading          | 0.19                          | 0.17                   | 0.0(2.12%)   |        | 23.10                     | 0.18                   | 0.5±0.4          | 78.0±68.0                | 0.05±0.09                        |
| Bremerton        | 0.12                          | 0.10                   | 0.01(8.39%)  |        | 25.30                     | 0.10                   | 0.9±0.7          | 138.0±105.0              | 0.06±0.09                        |
| Richmond         | 0.61                          | 0.55                   | 0.01(1.82%)  |        | 25.50                     | 0.57                   | 0.3±0.5          | 54.0±74.0                | 0.12±0.16                        |
| Bridgeport       | 0.43                          | 0.36                   | 0.04(10.40%) |        | 26.60                     | 0.38                   | 0.9±0.5          | 141.0±76.0               | 0.21±0.23                        |
| Buffalo          | 0.50                          | 0.46                   | 0.02(3.29%)  |        | 21.30                     | 0.47                   | 0.3±0.8          | 52.0±127.0               | 0.1±0.15                         |
| Boulder          | 0.15                          | 0.12                   | 0.01(5.99%)  |        | 26.20                     | 0.13                   | 0.9±1.8          | 150.0±280.0              | 0.08±0.1                         |
| Lexington        | 0.24                          | 0.22                   | 0.0(1.42%)   |        | 24.80                     | 0.22                   | 0.4±0.8          | 59.0±124.0               | 0.05±0.13                        |
| Ann Arbor        | 0.16                          | 0.14                   | 0.01(6.37%)  |        | 27.60                     | 0.14                   | 0.6±0.6          | 96.0±100.0               | 0.06±0.05                        |
| Tucson           | 0.42                          | 0.37                   | 0.01(2.32%)  |        | 24.70                     | 0.38                   | 0.5±0.8          | 83.0±126.0               | 0.13±0.17                        |
| Durham           | 0.26                          | 0.23                   | 0.01(3.75%)  |        | 26.90                     | 0.24                   | 0.5±0.4          | 75.0±72.0                | 0.07±0.06                        |
| Omaha            | 0.45                          | 0.42                   | 0.0(0.74%)   |        | 20.40                     | 0.43                   | 0.1±0.4          | 23.0±73.0                | 0.04±0.08                        |
| Hartford         | 0.56                          | 0.52                   | 0.02(2.83%)  |        | 24.90                     | 0.53                   | 0.4±0.3          | 69.0±45.0                | 0.15±0.23                        |
| Lancaster        | 0.24                          | 0.21                   | 0.0(1.03%)   |        | 21.80                     | 0.22                   | 0.8±0.5          | 130.0±82.0               | 0.12±0.09                        |
| Colorado Springs | 0.33                          | 0.30                   | 0.0(0.66%)   |        | 22.80                     | 0.31                   | 0.1±1.0          | 22.0±151.0               | 0.03±0.13                        |
| Lincoln          | 0.17                          | 0.15                   | 0.0(1.12%)   |        | 20.20                     | 0.16                   | 0.2±1.2          | 40.0±189.0               | 0.03±0.08                        |
| Salinas          | 0.18                          | 0.14                   | 0.0(1.46%)   |        | 23.40                     | 0.15                   | 0.5±0.4          | 77.0±56.0                | 0.05±0.07                        |
| Rochester        | 0.11                          | 0.09                   | 0.01(5.09%)  |        | 20.70                     | 0.10                   | 0.4±0.6          | 67.0±88.0                | 0.03±0.05                        |
| Duluth           | 0.12                          | 0.11                   | 0.0(2.28%)   |        | 21.30                     | 0.12                   | 0.4±0.4          | 58.0±58.0                | 0.03±0.06                        |
| Provo            | 0.26                          | 0.23                   | 0.01(2.28%)  |        | 19.60                     | 0.24                   | 0.2±0.6          | 40.0±92.0                | 0.04±0.12                        |
| Salt Lake City   | 0.57                          | 0.50                   | 0.02(3.46%)  |        | 23.90                     | 0.52                   | 0.3±0.6          | 54.0±104.0               | 0.11±0.15                        |
| Greenville       | 0.40                          | 0.37                   | 0.0(0.36%)   |        | 24.10                     | 0.38                   | 0.3±0.8          | 52.0±136.0               | 0.08±0.12                        |
| Memphis          | 0.60                          | 0.56                   | 0.0(0.68%)   |        | 24.80                     | 0.57                   | 0.1±1.4          | 19.0±231.0               | 0.04±0.1                         |
| Stockton         | 0.30                          | 0.27                   | 0.01(1.67%)  |        | 27.30                     | 0.28                   | 0.8±1.0          | 133.0±163.0              | 0.15±0.18                        |
| Vallejo          | 0.20                          | 0.17                   | 0.01(3.54%)  |        | 25.00                     | 0.18                   | 0.7±0.5          | 109.0±82.0               | 0.08±0.13                        |
| Las Vegas        | 0.99                          | 0.87                   | 0.03(3.46%)  |        | 23.80                     | 0.90                   | 0.3±0.5          | 50.0±84.0                | 0.18±0.27                        |
| Ogden            | 0.30                          | 0.27                   | 0.0(1.58%)   |        | 19.30                     | 0.28                   | 0.1±0.4          | 19.0±69.0                | 0.02±0.06                        |
| Virginia Beach   | 0.80                          | 0.73                   | 0.01(1.55%)  |        | 24.90                     | 0.75                   | 0.4±1.4          | 57.0±222.0               | 0.17±0.27                        |
| Fresno           | 0.38                          | 0.34                   | 0.0(1.12%)   |        | 22.30                     | 0.35                   | 0.2±0.2          | 30.0±28.0                | 0.04±0.17                        |
| Baton Rouge      | 0.36                          | 0.34                   | 0.0(0.94%)   |        | 27.80                     | 0.34                   | 0.6±2.2          | 93.0±357.0               | 0.13±0.23                        |
| Detroit          | 1.90                          | 1.75                   | 0.03(1.40%)  |        | 27.40                     | 1.79                   | 0.2±0.8          | 39.0±121.0               | 0.28±0.42                        |
| Tulsa            | 0.43                          | 0.40                   | 0.0(0.55%)   |        | 22.10                     | 0.41                   | 0.2±0.3          | 33.0±51.0                | 0.05±0.17                        |
