# Supplementary material for: Estimating road traffic impacts of commute mode shifts
Source: PubMed Central journal article supplement (PMC9833534; doi:10.1371/journal.pone.0279738), 2023-01-11
Supplement: pone.0279738.s004.pdf [file pone.0279738.s004.pdf]

**Table S4.** Summary of inferred BPR model parameters for all 74 modeled metro areas.

|               | capacity (M) | free flow travel<br>time (min) | capacity<br>2018 | ratio | travel time ratio<br>2018 |
|---------------|--------------|--------------------------------|------------------|-------|---------------------------|
| New York      | 4.27         | 23.5                           | 1.21             |       | 1.34                      |
| San Francisco | 0.86         | 14.7                           | 1.73             |       | 2.33                      |
| Los Angeles   | 4.10         | 23.1                           | 1.25             |       | 1.37                      |
| Boston        | 1.39         | 22.3                           | 1.29             |       | 1.44                      |
| Philadelphia  | 1.75         | 20.5                           | 1.28             |       | 1.41                      |
| Chicago       | 3.24         | 25.1                           | 1.07             |       | 1.21                      |
| Seattle       | 1.12         | 21.3                           | 1.30             |       | 1.44                      |
| Houston       | 2.62         | 25.3                           | 1.07             |       | 1.18                      |
| Dallas        | 3.16         | 24.8                           | 1.01             |       | 1.14                      |
| San Jose      | 0.57         | 20.3                           | 1.43             |       | 1.61                      |
| Atlanta       | 2.23         | 27.0                           | 1.07             |       | 1.20                      |
| Miami         | 2.08         | 23.2                           | 1.17             |       | 1.29                      |
| Portland      | 0.80         | 20.9                           | 1.18             |       | 1.27                      |
| Riverside     | 1.56         | 23.1                           | 1.08             |       | 1.19                      |
| Orlando       | 0.99         | 25.0                           | 1.07             |       | 1.18                      |
| Washington    | 2.95         | 32.4                           | 0.79             |       | 1.07                      |
| Baltimore     | 0.95         | 22.9                           | 1.20             |       | 1.32                      |
| Tampa         | 1.12         | 23.2                           | 1.06             |       | 1.18                      |
| Denver        | 1.26         | 24.0                           | 1.00             |       | 1.15                      |
| Providence    | 0.56         | 17.9                           | 1.21             |       | 1.31                      |
| Jacksonville  | 0.57         | 22.8                           | 1.07             |       | 1.17                      |
| San Diego     | 1.13         | 20.9                           | 1.18             |       | 1.31                      |
| Phoenix       | 2.15         | 24.2                           | 0.85             |       | 1.08                      |
| San Antonio   | 0.96         | 22.3                           | 1.02             |       | 1.16                      |
| Cincinnati    | 0.92         | 21.9                           | 1.01             |       | 1.15                      |
| Oxnard        | 0.24         | 15.3                           | 1.43             |       | 1.61                      |
| Raleigh       | 0.54         | 22.2                           | 1.08             |       | 1.20                      |
| Austin        | 0.91         | 24.0                           | 1.02             |       | 1.17                      |
| St. Louis     | 1.02         | 20.0                           | 1.19             |       | 1.31                      |
| Charlotte     | 1.09         | 24.1                           | 0.98             |       | 1.14                      |
| Pittsburgh    | 0.89         | 22.7                           | 1.03             |       | 1.18                      |
| North Port    | 0.25         | 20.3                           | 1.15             |       | 1.24                      |
| Allentown     | 0.31         | 19.8                           | 1.12             |       | 1.22                      |
| Oklahoma City | 0.59         | 20.3                           | 1.01             |       | 1.15                      |
| Nashville     | 0.84         | 25.2                           | 1.01             |       | 1.16                      |
| Minneapolis   | 1.99         | 24.0                           | 0.80             |       | 1.06                      |
| Charleston    | 0.26         | 20.4                           | 1.27             |       | 1.40                      |
| Sacramento    | 0.86         | 23.0                           | 1.01             |       | 1.17                      |
| Boise City    | 0.32         | 20.0                           | 0.91             |       | 1.09                      |
| Santa Rosa    | 0.18         | 19.0                           | 1.12             |       | 1.23                      |
| Kansas City   | 1.00         | 21.1                           | 0.95             |       | 1.12                      |
| Savannah      | 0.16         | 22.7                           | 1.04             |       | 1.16                      |
| Louisville    | 0.55         | 21.6                           | 0.99             |       | 1.15                      |
| Reading       | 0.15         | 18.8                           | 1.11             |       | 1.22                      |
| Bremerton     | 0.09         | 21.2                           | 1.06             |       | 1.18                      |
| Richmond      | 0.55         | 22.1                           | 1.00             |       | 1.16                      |
| Bridgeport    | 0.34         | 22.6                           | 1.04             |       | 1.20                      |
| Buffalo       | 0.44         | 18.0                           | 1.05             |       | 1.19                      |
| Boulder       | 0.11         | 21.8                           | 1.08             |       | 1.22                      |
| Ann Arbor     | 0.14         | 24.0                           | 1.00             |       | 1.16                      |

*Continued on the next page*

Table S4 – continued from previous page

|                  | capacity (M) | free flow travel<br>time (min) | capacity<br>2018 | ratio | travel time ratio<br>2018 |
|------------------|--------------|--------------------------------|------------------|-------|---------------------------|
| Lexington        | 0.21         | 20.7                           | 1.07             |       | 1.20                      |
| Omaha            | 0.46         | 18.5                           | 0.91             |       | 1.11                      |
| Tucson           | 0.35         | 21.1                           | 1.03             |       | 1.19                      |
| Durham           | 0.23         | 23.4                           | 0.99             |       | 1.16                      |
| Colorado Springs | 0.36         | 21.2                           | 0.83             |       | 1.07                      |
| Lancaster        | 0.17         | 15.5                           | 1.28             |       | 1.44                      |
| Hartford         | 0.47         | 20.4                           | 1.10             |       | 1.24                      |
| Lincoln          | 0.15         | 17.2                           | 1.03             |       | 1.18                      |
| Salinas          | 0.16         | 21.5                           | 0.88             |       | 1.11                      |
| Rochester        | 0.09         | 18.1                           | 0.99             |       | 1.17                      |
| Duluth           | 0.10         | 17.6                           | 1.09             |       | 1.24                      |
| Salt Lake City   | 0.54         | 21.6                           | 0.92             |       | 1.12                      |
| Provo            | 0.25         | 17.7                           | 0.92             |       | 1.12                      |
| Greenville       | 0.34         | 20.1                           | 1.07             |       | 1.22                      |
| Memphis          | 0.67         | 23.2                           | 0.83             |       | 1.08                      |
| Stockton         | 0.22         | 20.0                           | 1.25             |       | 1.41                      |
| Vallejo          | 0.16         | 20.7                           | 1.08             |       | 1.25                      |
| Las Vegas        | 0.96         | 21.6                           | 0.91             |       | 1.12                      |
| Ogden            | 0.34         | 18.1                           | 0.81             |       | 1.08                      |
| Virginia Beach   | 0.70         | 21.0                           | 1.05             |       | 1.20                      |
| Fresno           | 0.40         | 20.7                           | 0.84             |       | 1.10                      |
| Baton Rouge      | 0.28         | 20.9                           | 1.22             |       | 1.38                      |
| Detroit          | 1.87         | 24.5                           | 0.94             |       | 1.13                      |
| Tulsa            | 0.42         | 19.6                           | 0.96             |       | 1.17                      |
