# Supplementary material for: Estimating road traffic impacts of commute mode shifts
Source: PubMed Central journal article supplement (PMC9833534; doi:10.1371/journal.pone.0279738), 2023-01-11
Supplement: pone.0279738.s005.pdf [file pone.0279738.s005.pdf]

**Table S5.** Percent of adaptation to work-from-home needed to offset the influence of 25% and 50% transit shift to SOV, out of all potential SOV commuters. Result for all 74 analysed cities are shown.

|               | 25% shift | 50% shift |
|---------------|-----------|-----------|
| New York      | 17.22%    | 34.50%    |
| San Francisco | 10.88%    | 21.78%    |
| Los Angeles   | 3.76%     | 7.61%     |
| Boston        | 7.27%     | 14.35%    |
| Philadelphia  | 5.03%     | 10.13%    |
| Chicago       | 6.24%     | 12.49%    |
| Seattle       | 6.30%     | 12.78%    |
| Houston       | 2.63%     | 5.21%     |
| Dallas        | 2.32%     | 4.60%     |
| San Jose      | 3.80%     | 7.78%     |
| Atlanta       | 3.05%     | 6.04%     |
| Miami         | 3.55%     | 6.90%     |
| Portland      | 4.24%     | 8.92%     |
| Riverside     | 2.32%     | 4.90%     |
| Orlando       | 2.57%     | 5.17%     |
| Washington    | 7.53%     | 14.92%    |
| Baltimore     | 3.47%     | 7.08%     |
| Tampa         | 2.11%     | 4.58%     |
| Denver        | 2.88%     | 6.08%     |
| Providence    | 2.65%     | 5.01%     |
| Jacksonville  | 3.01%     | 5.35%     |
| San Diego     | 2.91%     | 5.93%     |
| Phoenix       | 3.01%     | 6.19%     |
| San Antonio   | 3.14%     | 5.90%     |
| Cincinnati    | 2.52%     | 4.62%     |
| Oxnard        | 1.77%     | 4.15%     |
| Raleigh       | 1.33%     | 3.31%     |
| Austin        | 2.69%     | 5.31%     |
| St. Louis     | 1.61%     | 3.56%     |
| Charlotte     | 2.36%     | 4.72%     |
| Pittsburgh    | 3.53%     | 6.94%     |
| North Port    | 0.69%     | 2.88%     |
| Allentown     | 0.96%     | 3.32%     |
| Oklahoma City | 1.84%     | 3.77%     |
| Nashville     | 1.86%     | 3.95%     |
| Minneapolis   | 3.52%     | 6.78%     |
| Charleston    | 2.38%     | 4.40%     |
| Sacramento    | 2.59%     | 5.61%     |
| Boise City    | 3.50%     | 5.57%     |
| Santa Rosa    | 1.32%     | 4.03%     |
| Kansas City   | 2.32%     | 4.12%     |
| Savannah      | 3.96%     | 6.46%     |
| Louisville    | 2.75%     | 4.98%     |
| Reading       | 3.62%     | 6.37%     |
| Bremerton     | 4.39%     | 9.32%     |
| Richmond      | 3.26%     | 5.70%     |
| Bridgeport    | 4.40%     | 9.48%     |
| Buffalo       | 2.37%     | 4.77%     |
| Boulder       | 6.03%     | 10.99%    |
| Ann Arbor     | 3.39%     | 7.34%     |

*Continued on the next page*

Table S5 – continued from previous page

|                  | 25% shift | 50% shift |
|------------------|-----------|-----------|
| Lexington        | 2.15%     | 4.34%     |
| Omaha            | 2.25%     | 4.08%     |
| Tucson           | 2.36%     | 5.72%     |
| Durham           | 3.30%     | 6.55%     |
| Colorado Springs | 3.07%     | 5.30%     |
| Lancaster        | 4.99%     | 8.17%     |
| Hartford         | 1.70%     | 3.99%     |
| Lincoln          | 5.34%     | 7.49%     |
| Salinas          | 9.21%     | 15.13%    |
| Rochester        | 6.41%     | 10.29%    |
| Duluth           | 5.03%     | 7.45%     |
| Salt Lake City   | 3.38%     | 6.84%     |
| Provo            | 2.87%     | 6.03%     |
| Greenville       | 1.55%     | 3.52%     |
| Memphis          | 1.07%     | 2.83%     |
| Stockton         | 3.22%     | 6.00%     |
| Vallejo          | 6.54%     | 10.43%    |
| Las Vegas        | 3.17%     | 6.55%     |
| Ogden            | 3.39%     | 5.89%     |
| Virginia Beach   | 2.81%     | 5.08%     |
| Fresno           | 2.65%     | 5.53%     |
| Baton Rouge      | 0.99%     | 3.00%     |
| Detroit          | 2.36%     | 4.43%     |
| Tulsa            | 2.55%     | 4.54%     |
